# Supplementary material for: A “byproduct–intermediate–product” recycling strategy for multicomponent synthesis of 1,4-dihydropyridines
Source: Royal Society of Chemistry journal article supplement (doi:10.1039/c2ra23277d), 2012-12-13

## A “Byproduct-Intermediate-Product” Recycling Strategy for

### Multicomponent Synthesis of 1,4-Dihydropyridines

Jie-Ping Wan<sup>a,b\*</sup>, Zhou Rihui,<sup>a</sup> Yunyun Liu<sup>a,b</sup> and Mingzhong Cai<sup>b</sup>

<sup>a</sup>Key Laboratory of Functional Small organic molecule, Ministry of Education, Jiangxi Normal University, Nanchang 330022, P. R. China.

<sup>b</sup>College of Chemistry and Chemical Engineering, Jiangxi Normal University, Nanchang 330022, P. R. China.

Email: wanjieping@gmail.com

#### Contents

|                                                               |      |
|---------------------------------------------------------------|------|
| General experimental information.....                         | 1    |
| Copies of <sup>1</sup> H and <sup>13</sup> C NMR spectra..... | 2-18 |

#### General experimental information

All enaminones **6** were synthesized following literature procedure,<sup>1</sup> all other chemicals and solvent were obtained from commercial source and used without further purification. <sup>1</sup>H And <sup>13</sup>C and NMR were recorded respectively at 400 MHz/100 MHz or 300 MHz/75 MHz in Variant 400 MHz or 300 MHz apparatus (see characterization data), the chemical shift was recorded in ppm using TMS as internal standard. Mass spectra were measured with Finnigan SSQ7000 spectrometer under EI model. Elemental analysis was tested on Perkin Elmer 2400CHN instrument, and melting points were recorded in X-6 apparatus without correcting temperature.

---

(1) F. M. A. A. El-Taweel, M. H. Elnagdi, *J. Heterocyclic Chem.* **2001**, *38*, 981.

3a

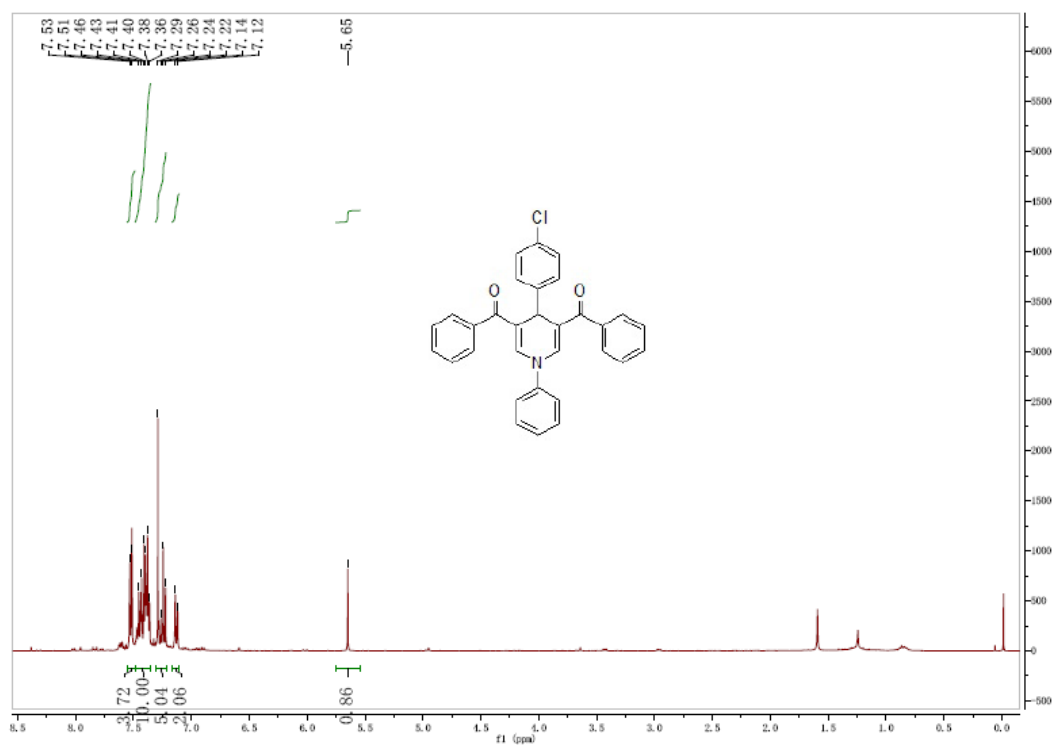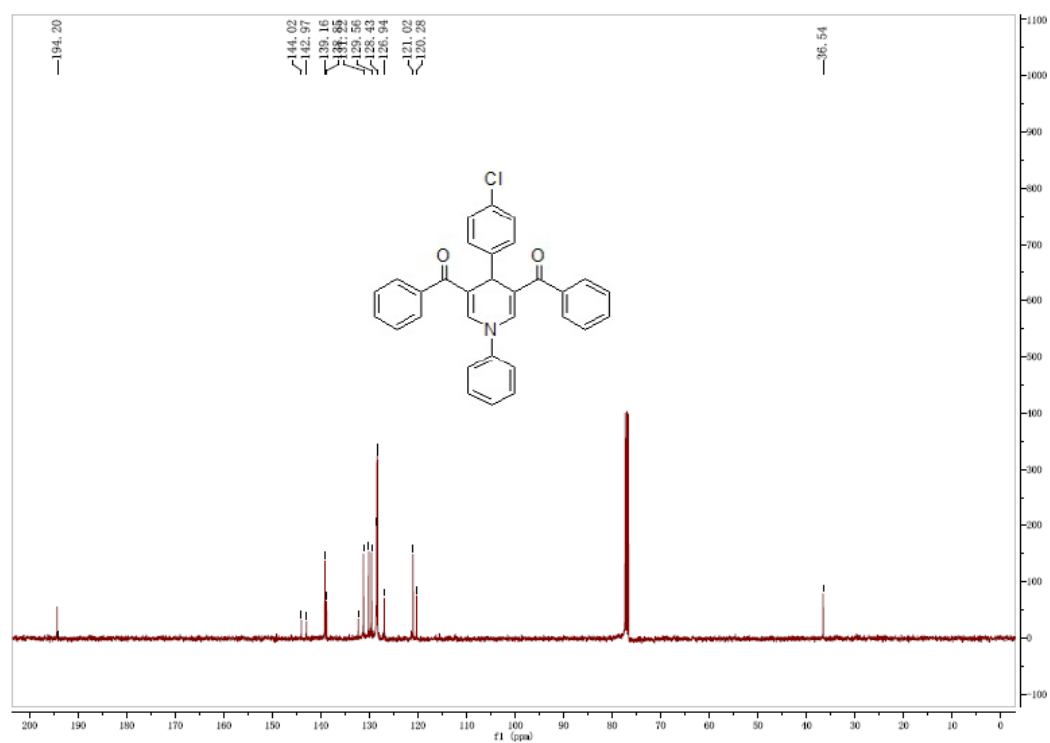

3b

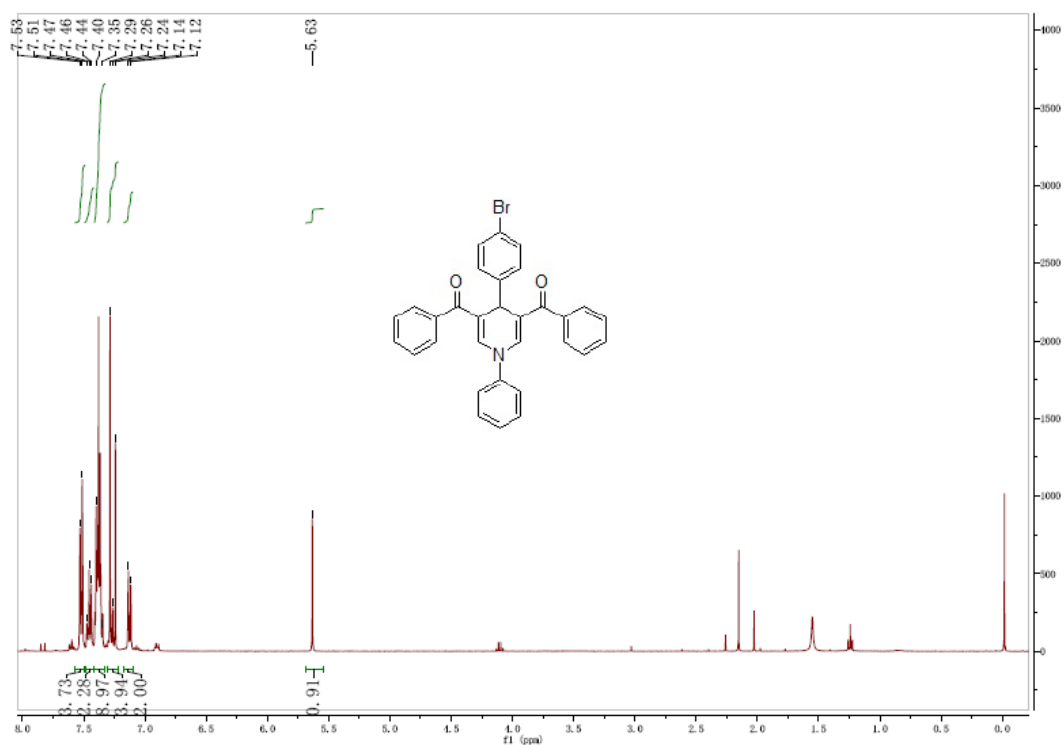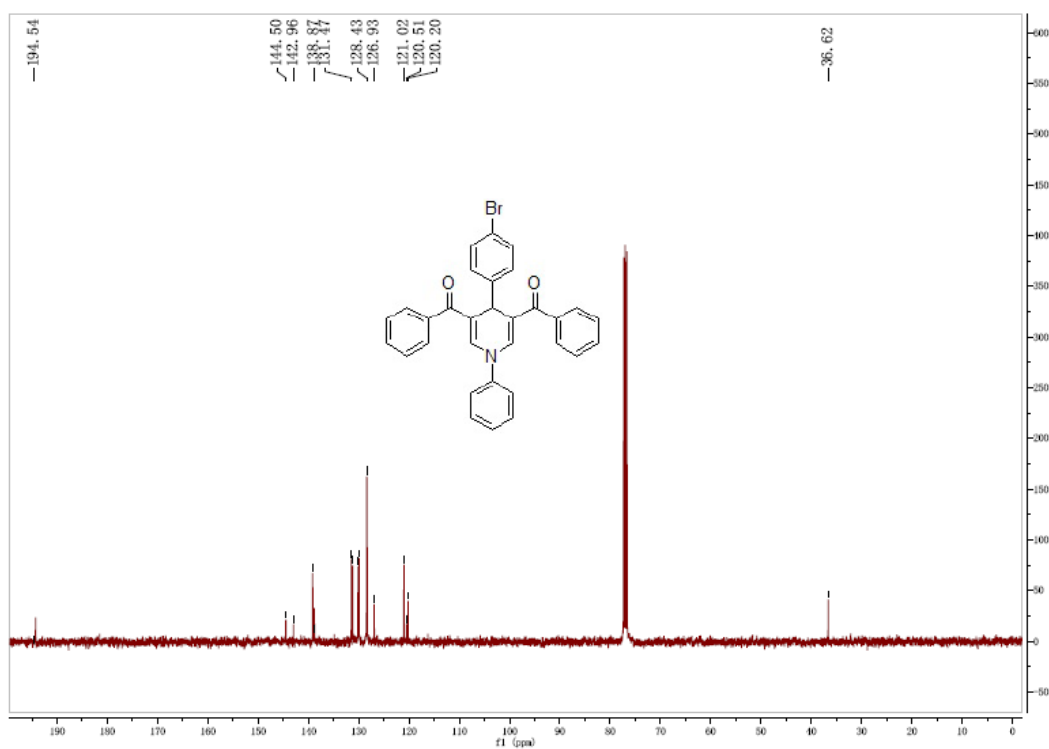

3c

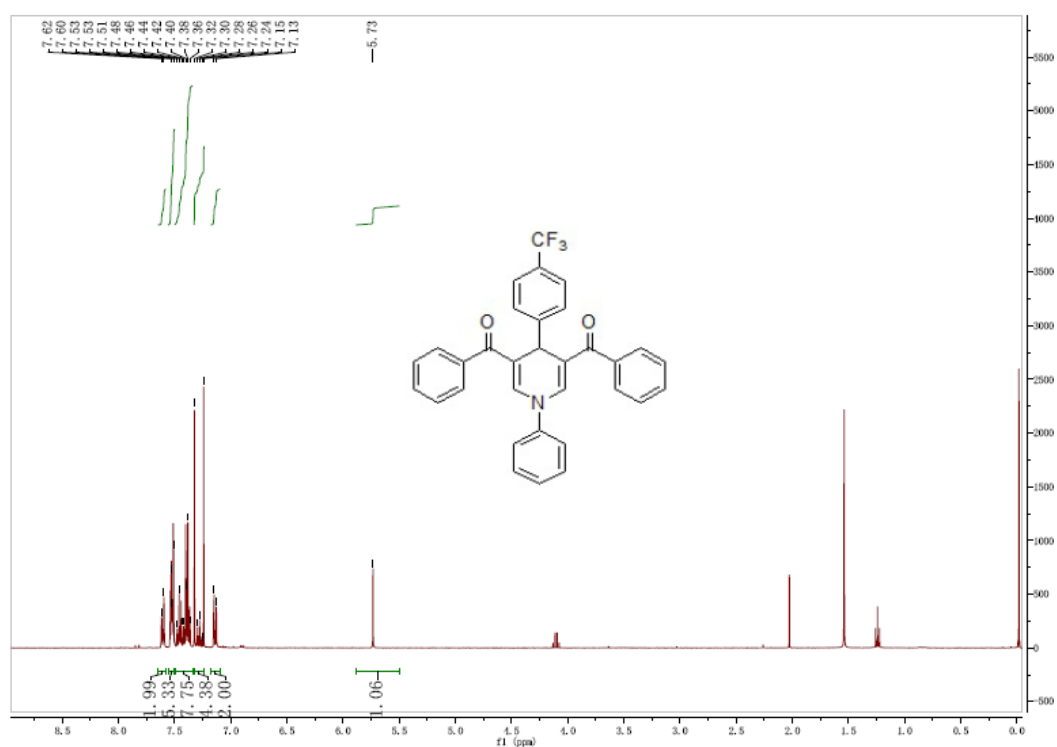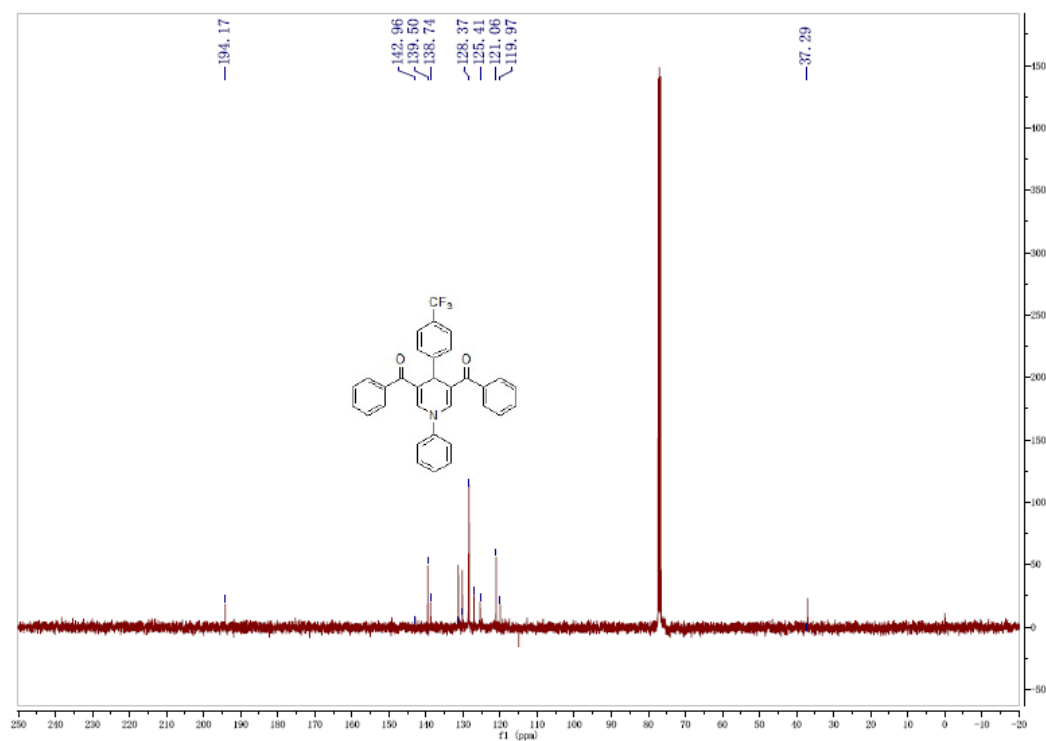

3d

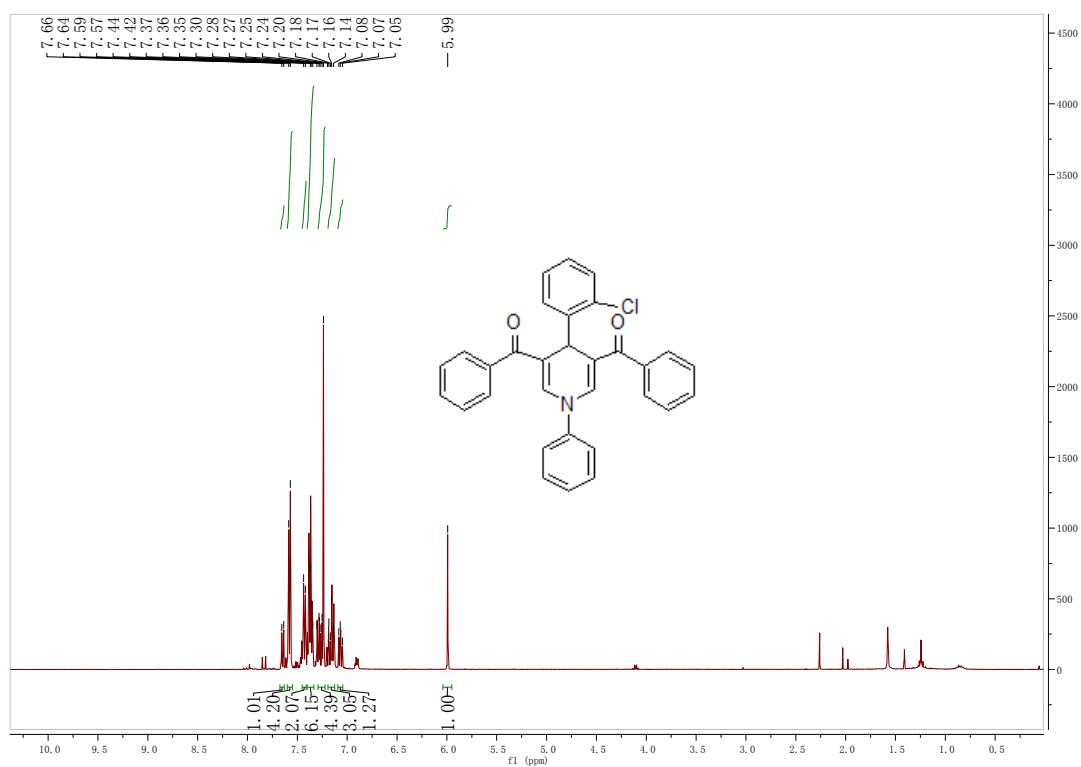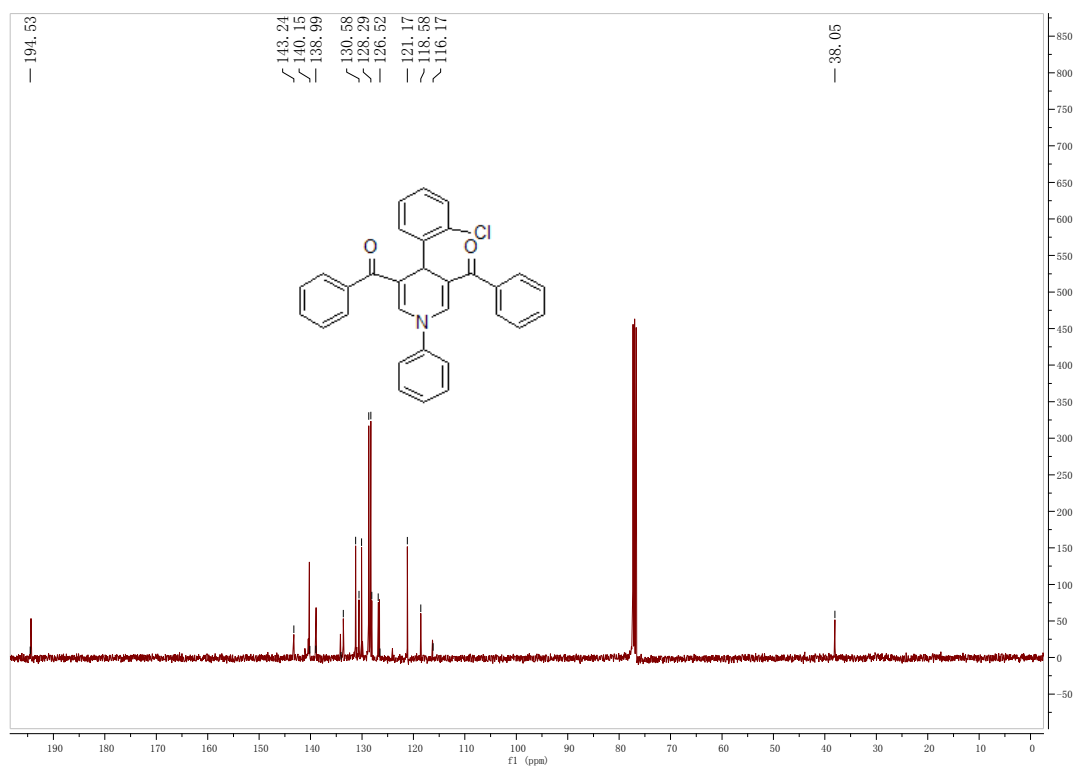

3e

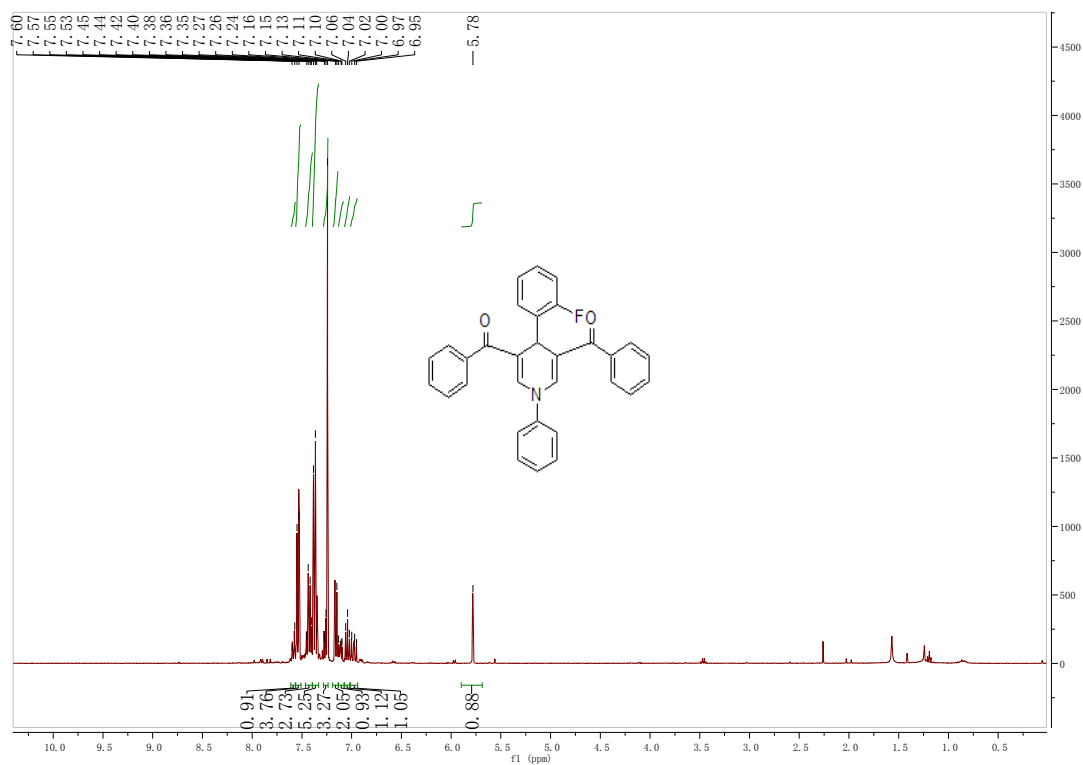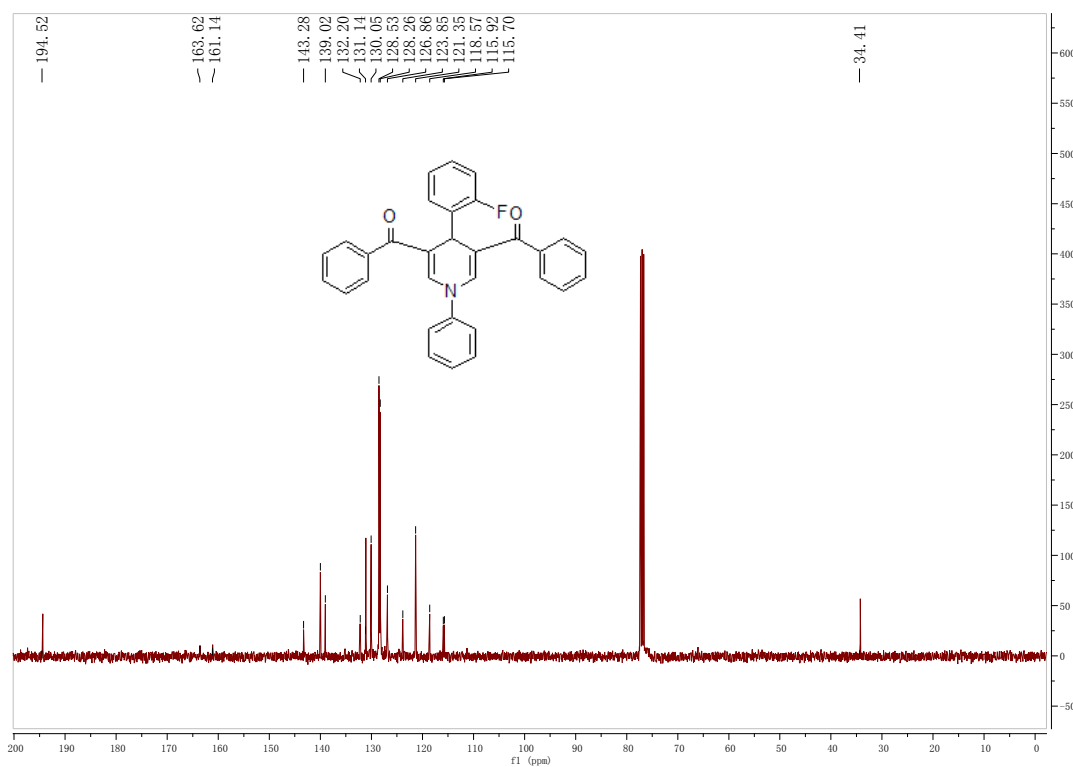

3f

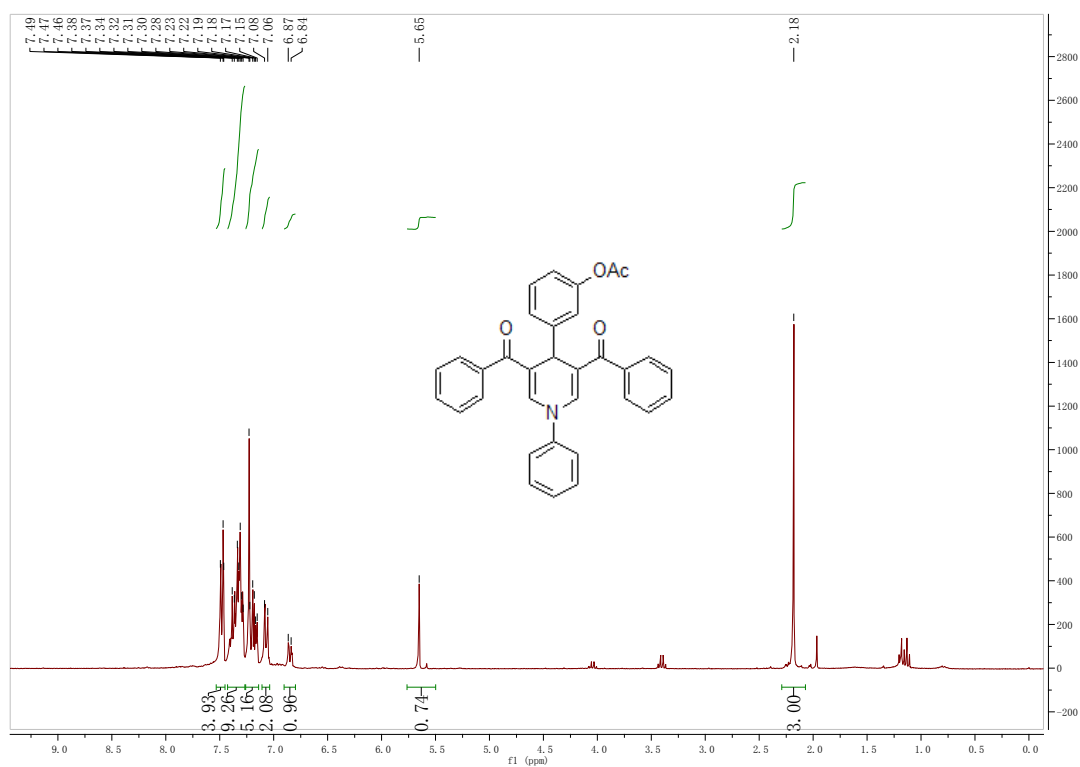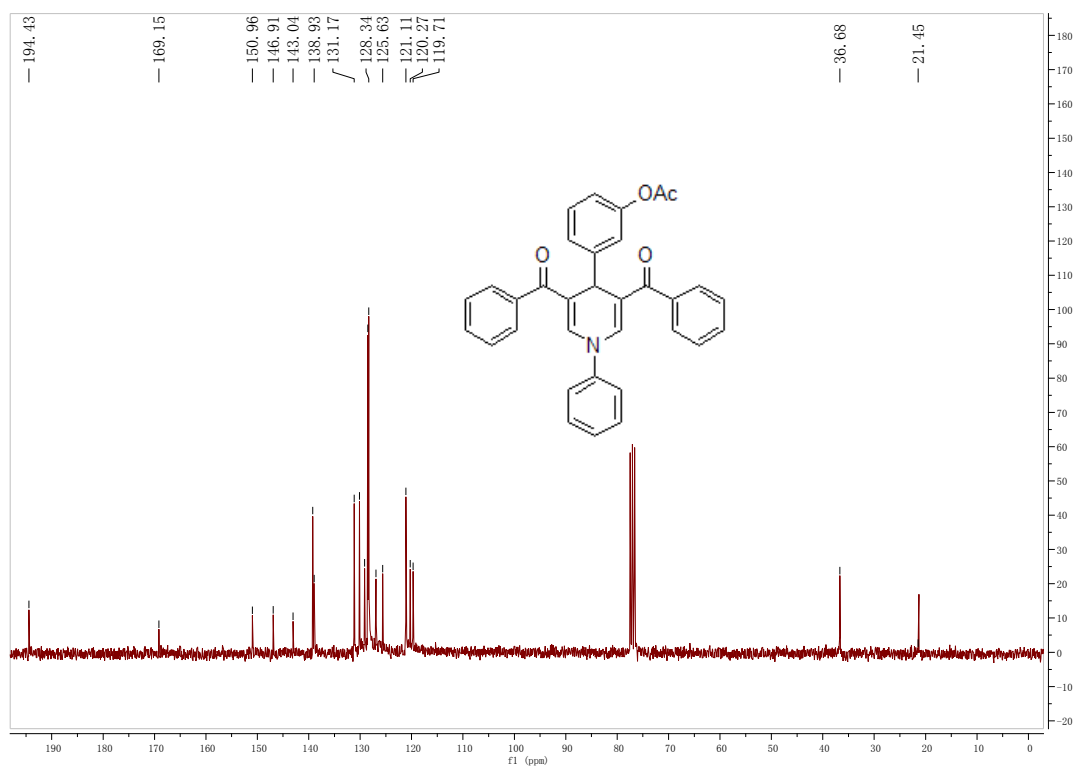

3g

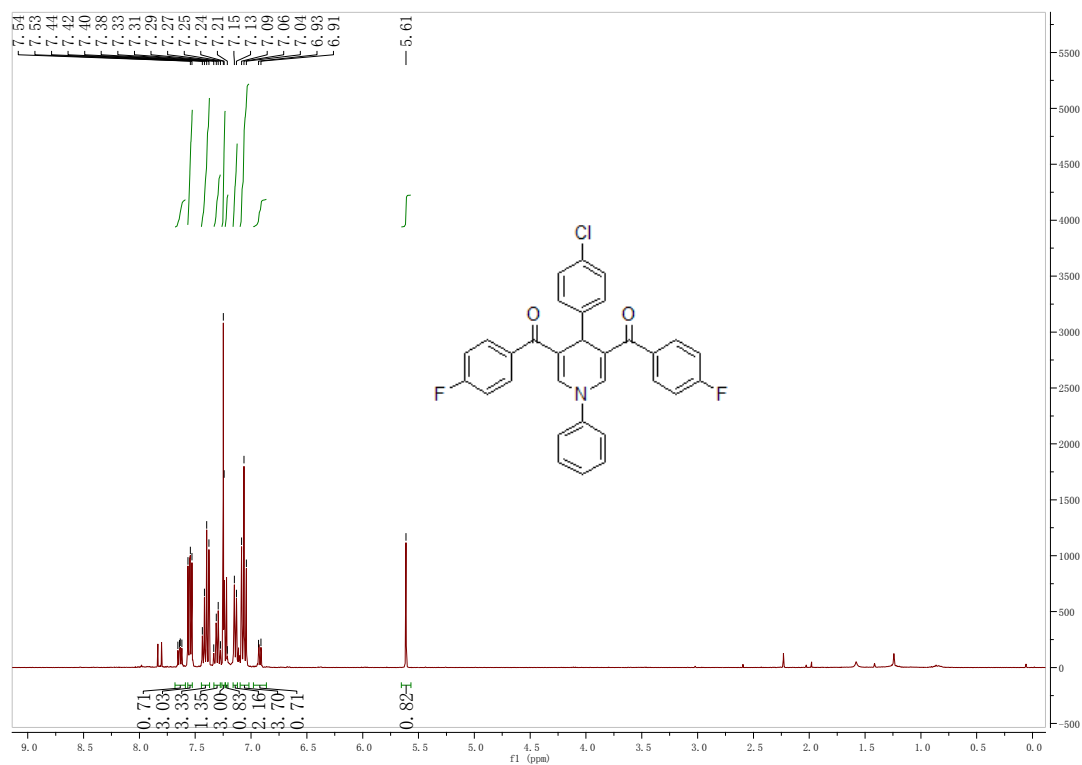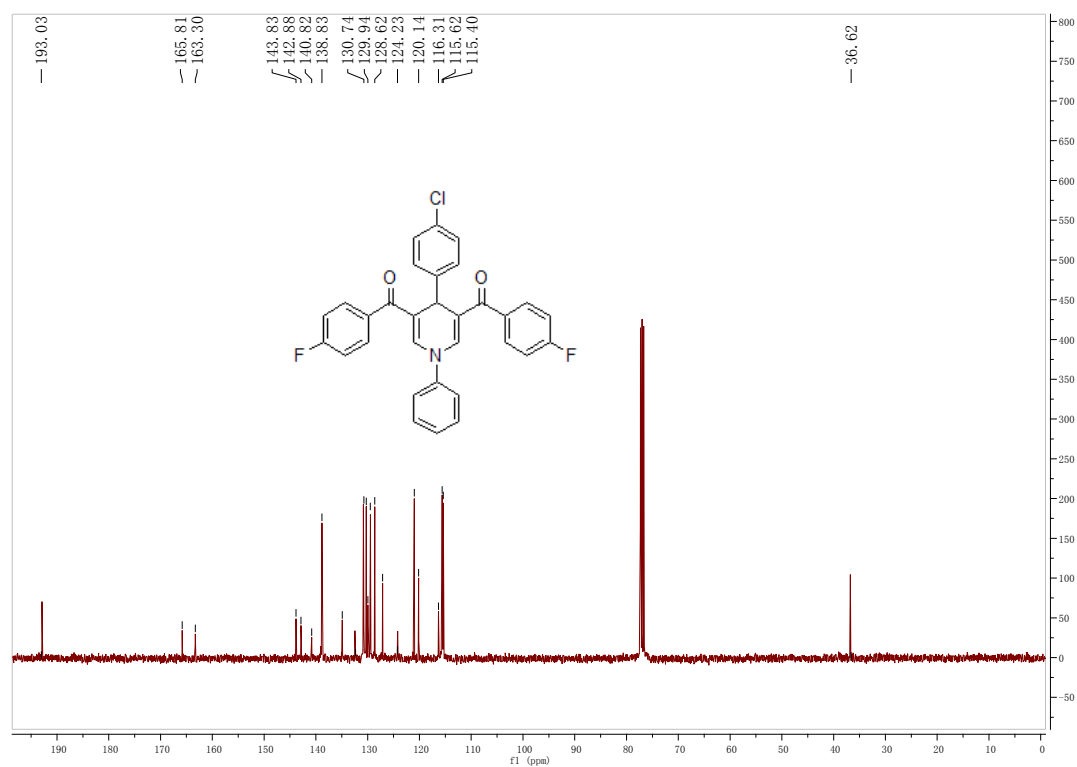



3h

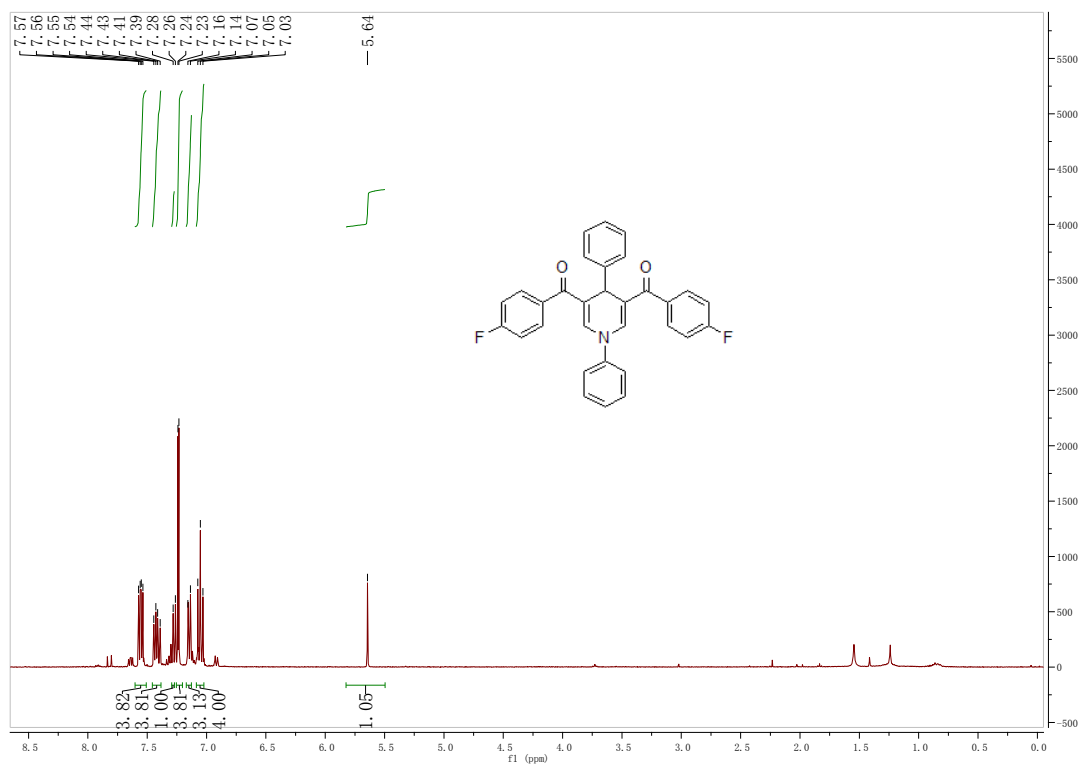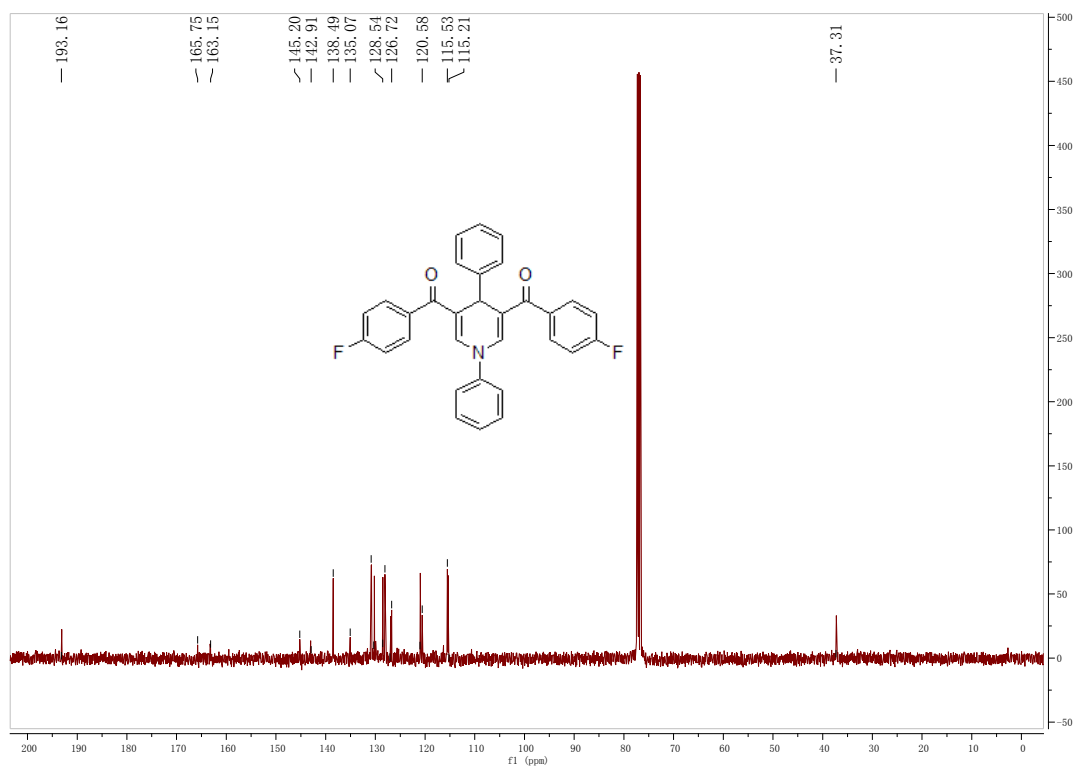



3j

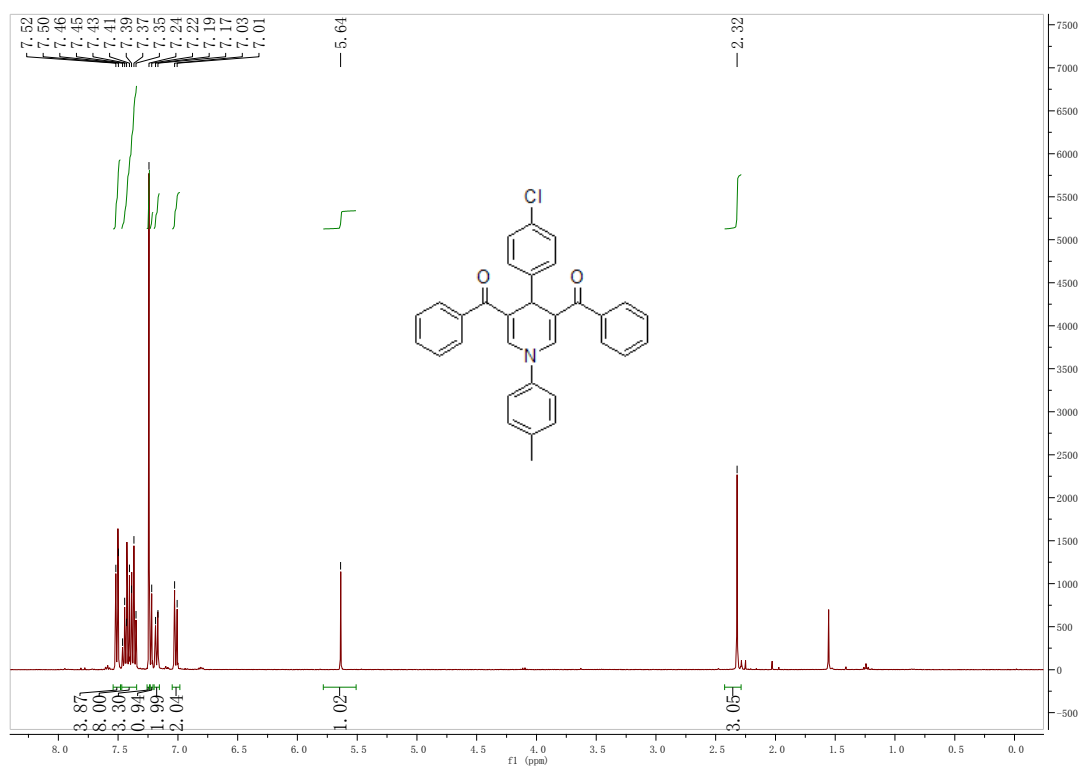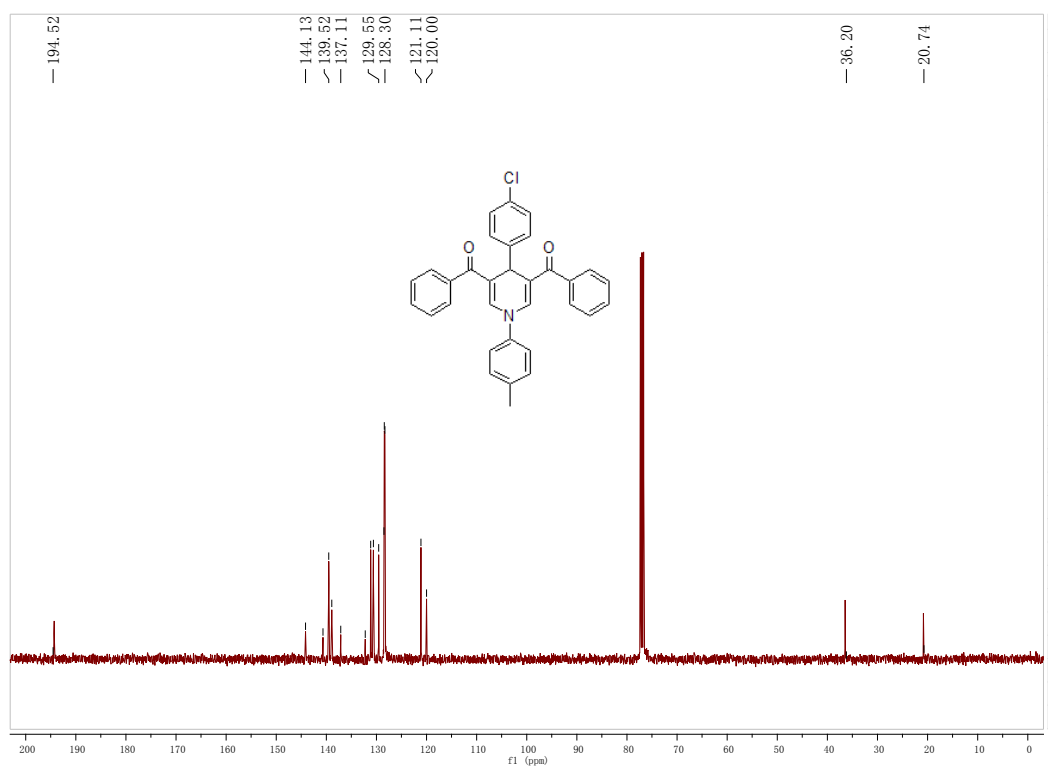

3k

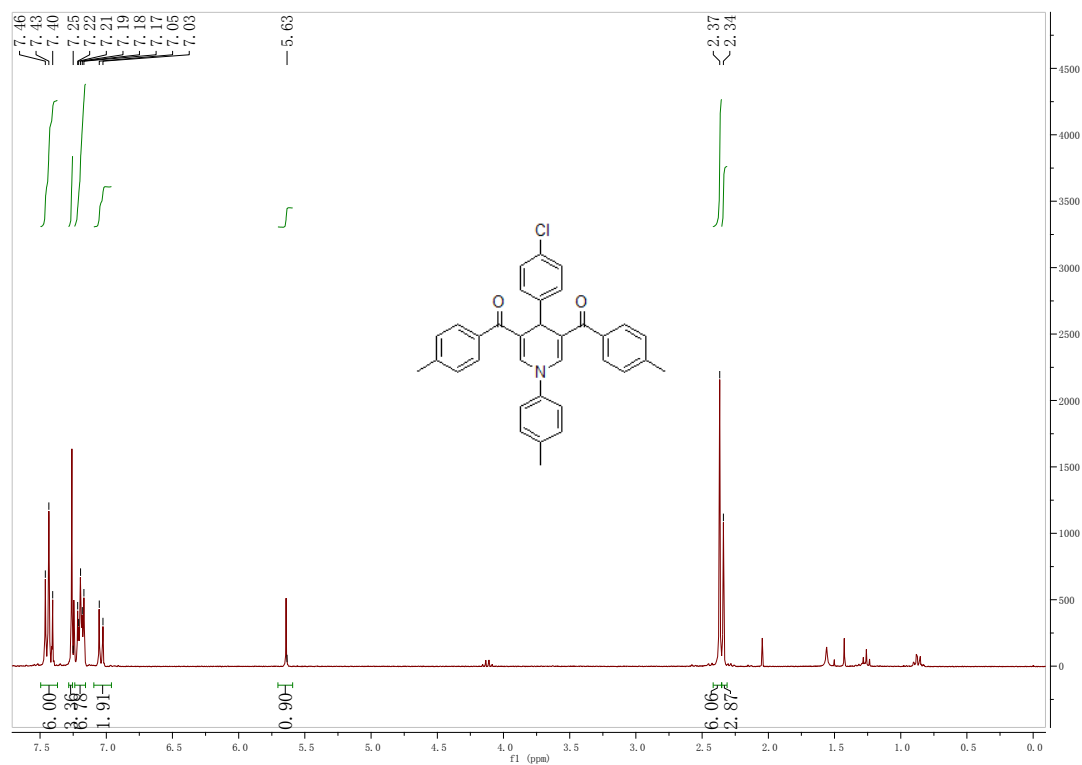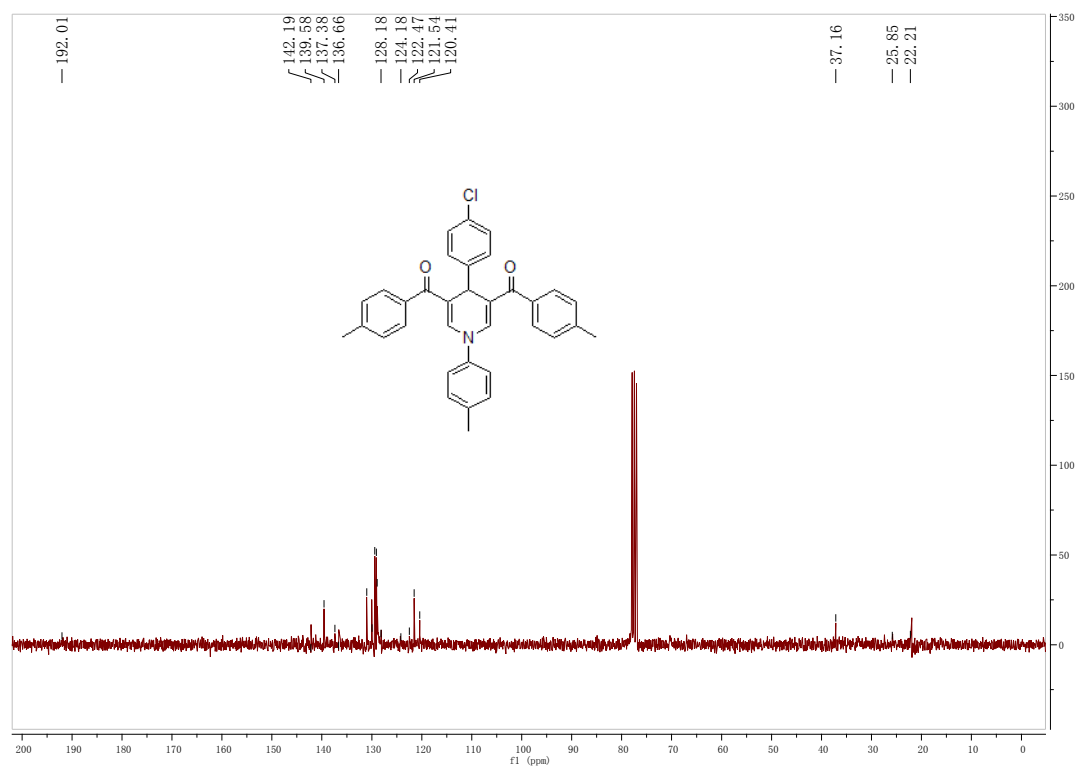

31

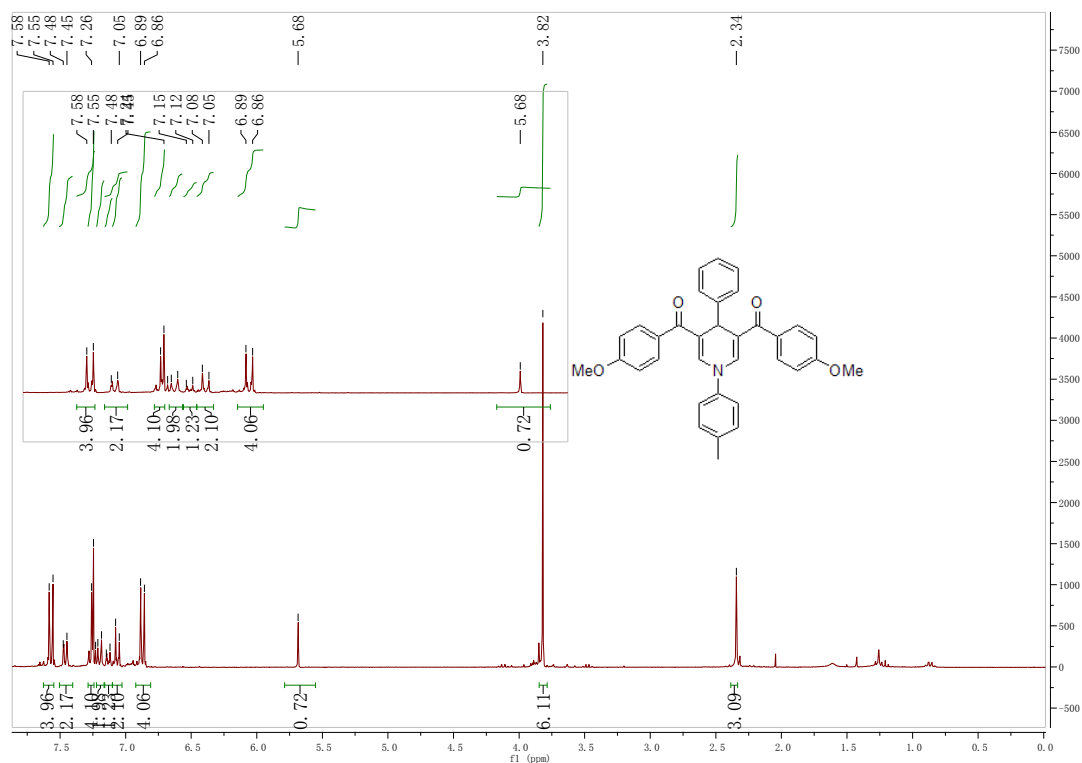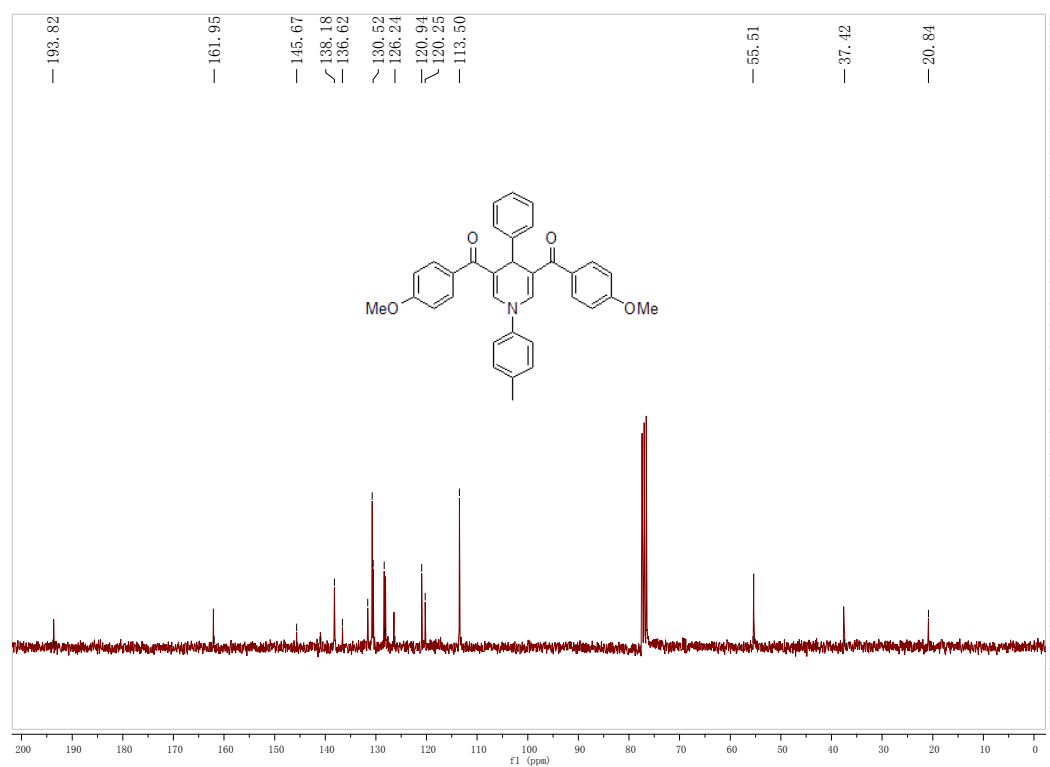

### 3m

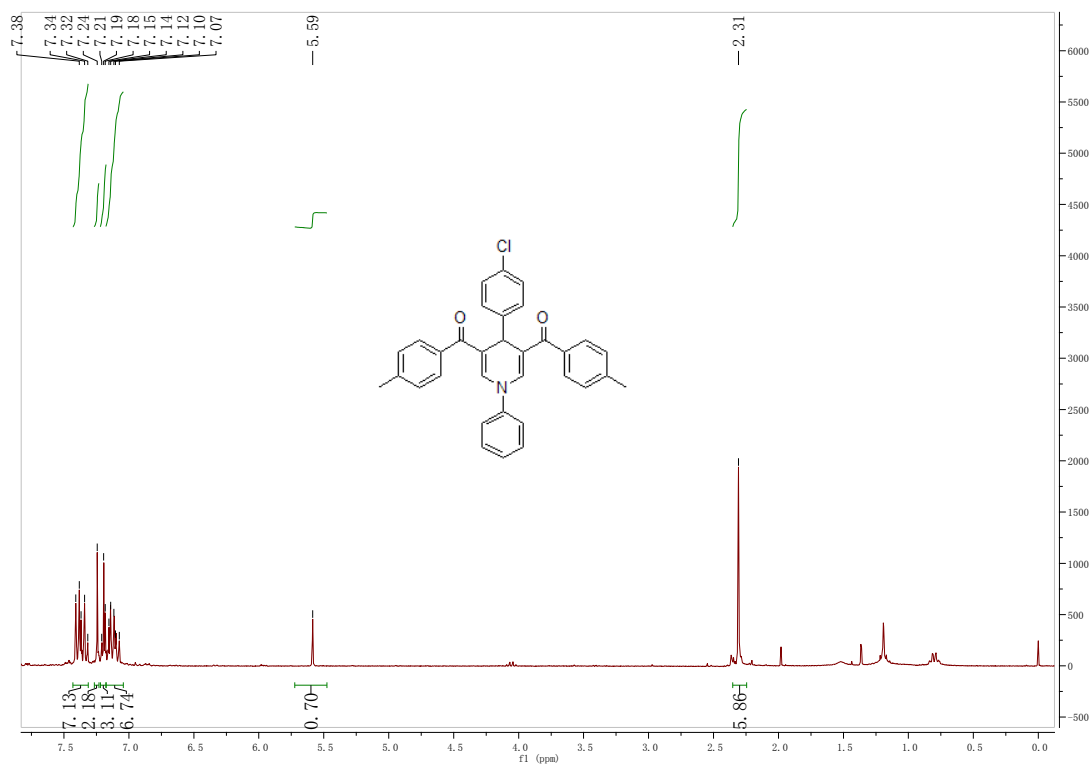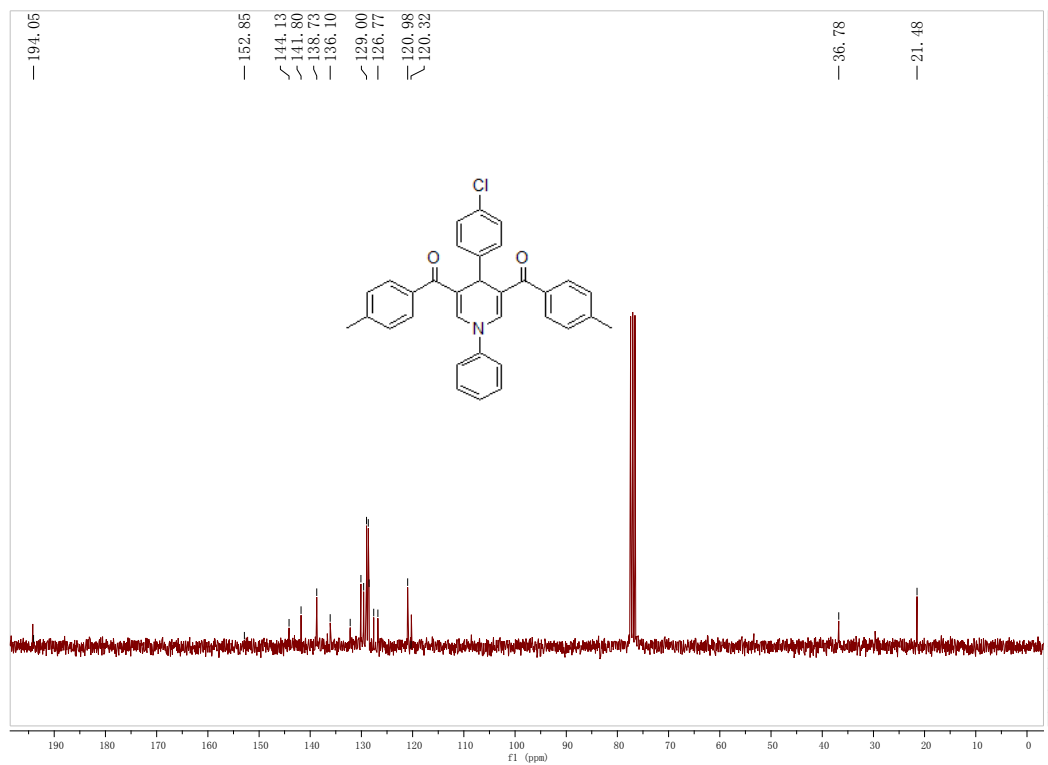

### 3n

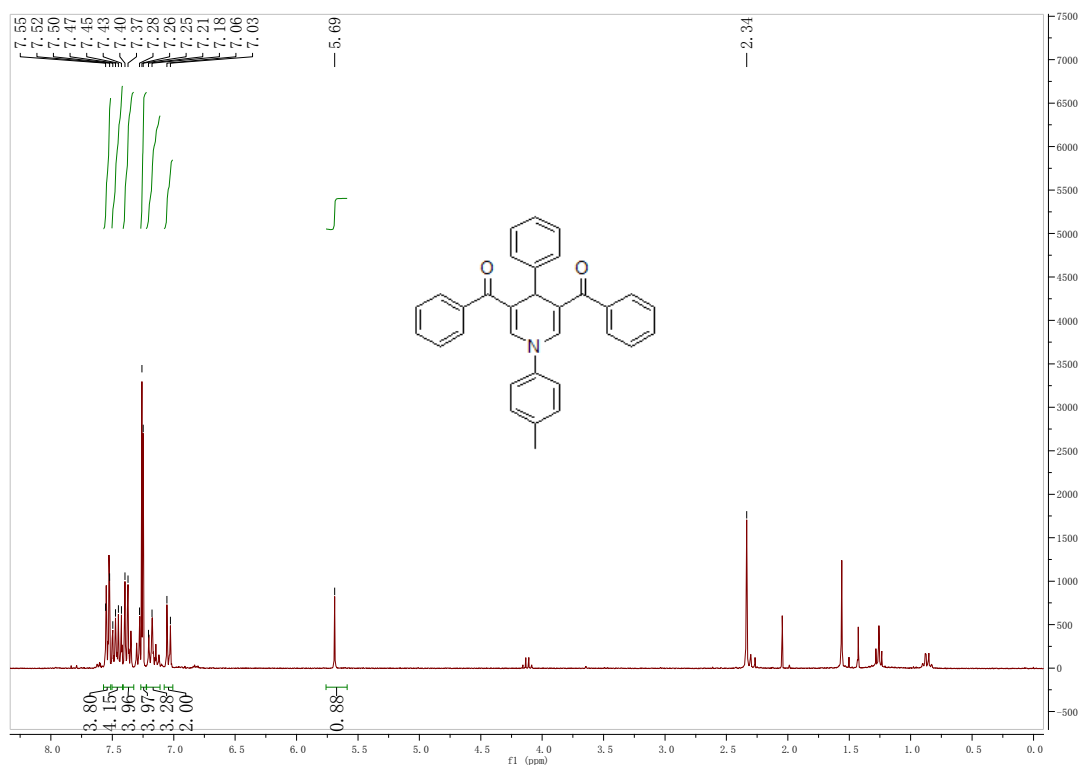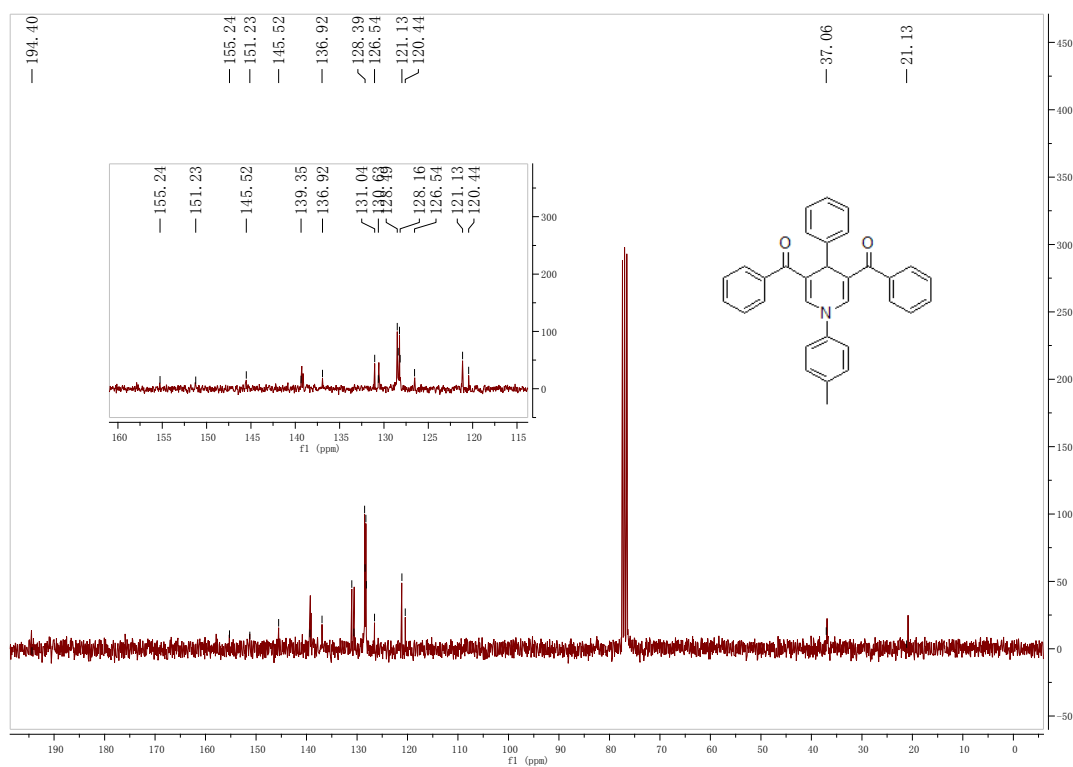

30

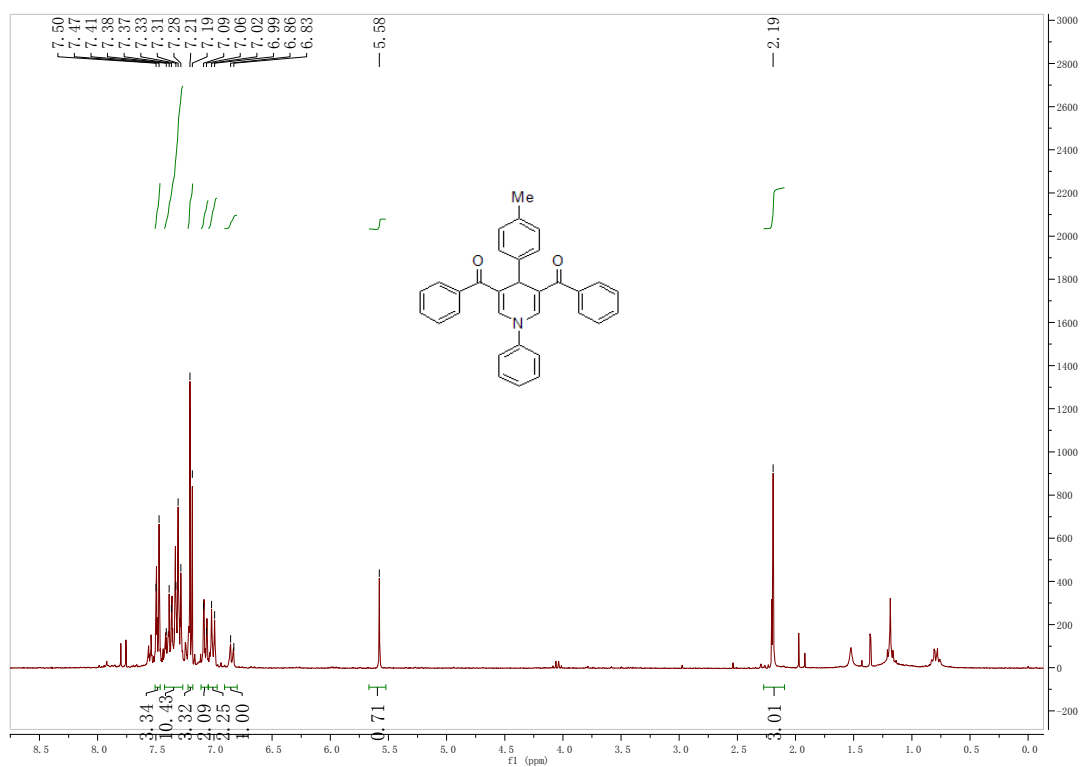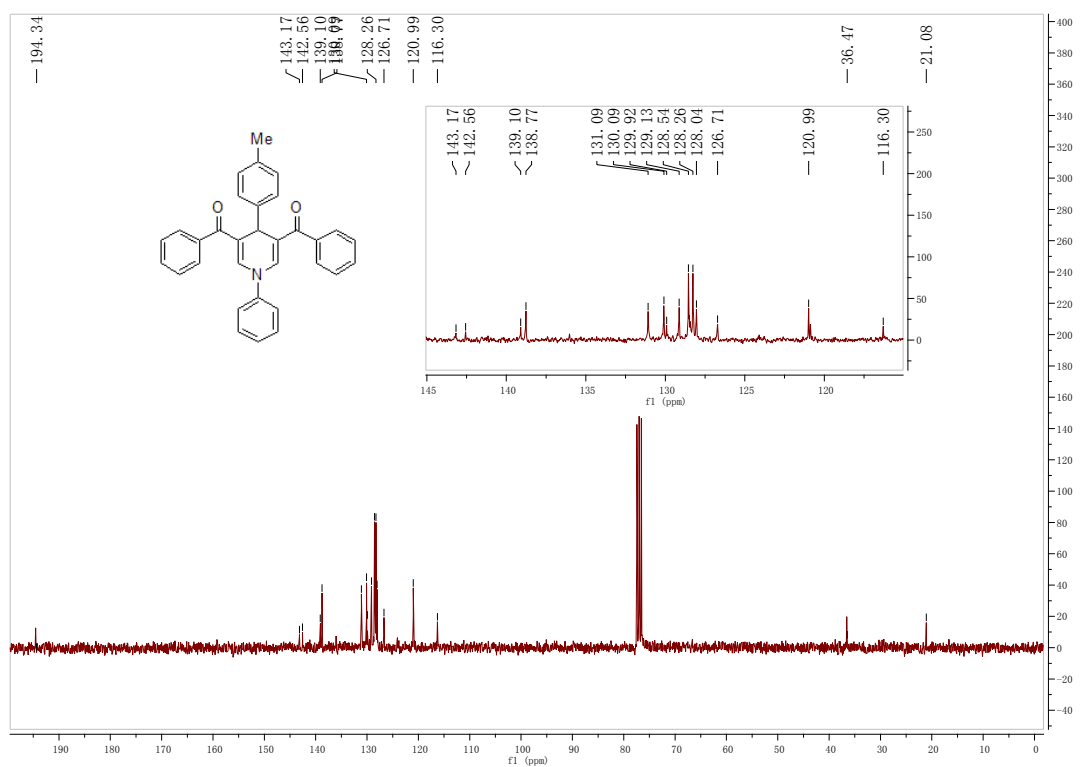



3p

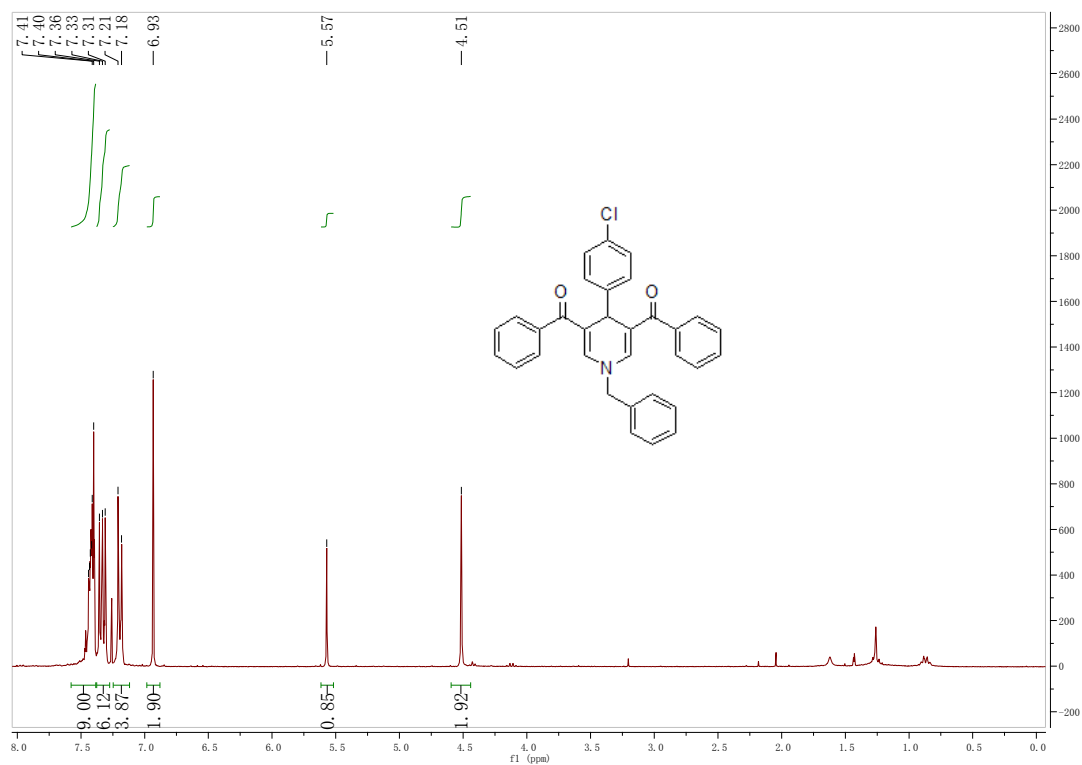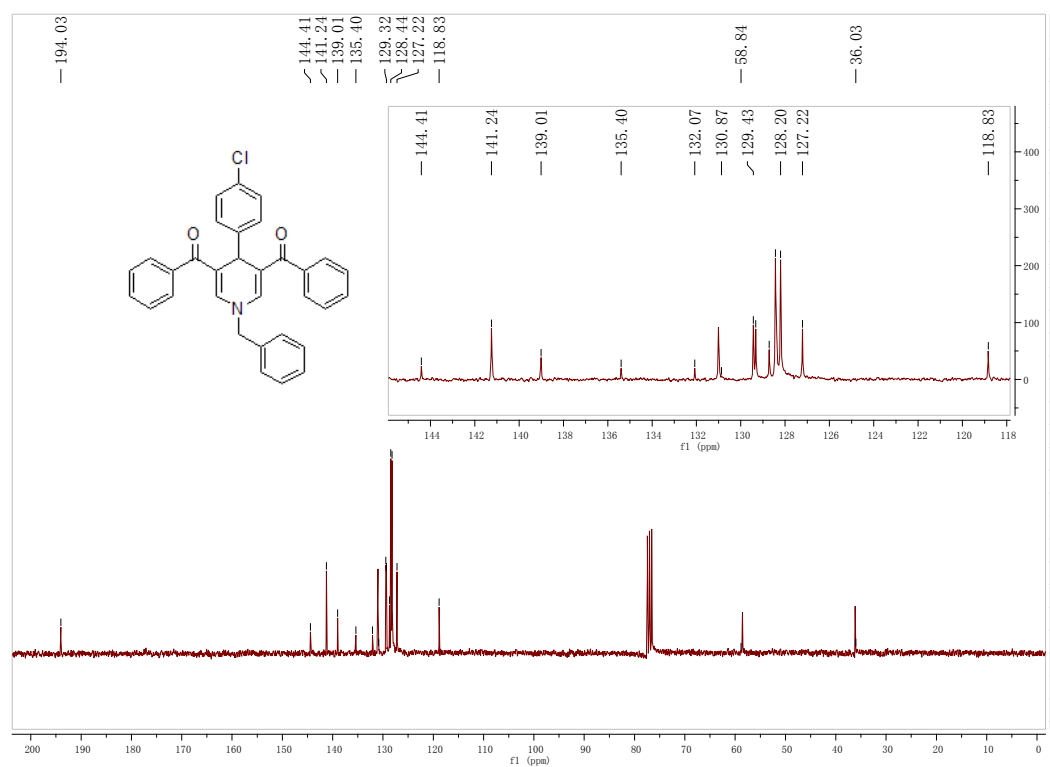

3s

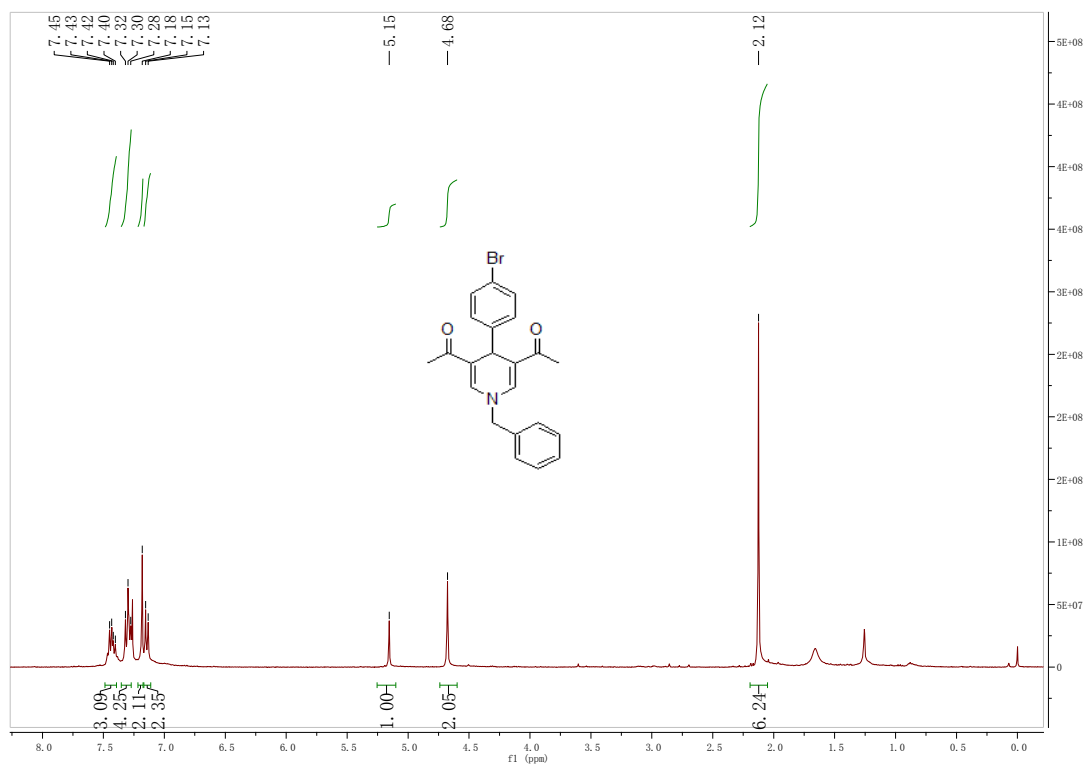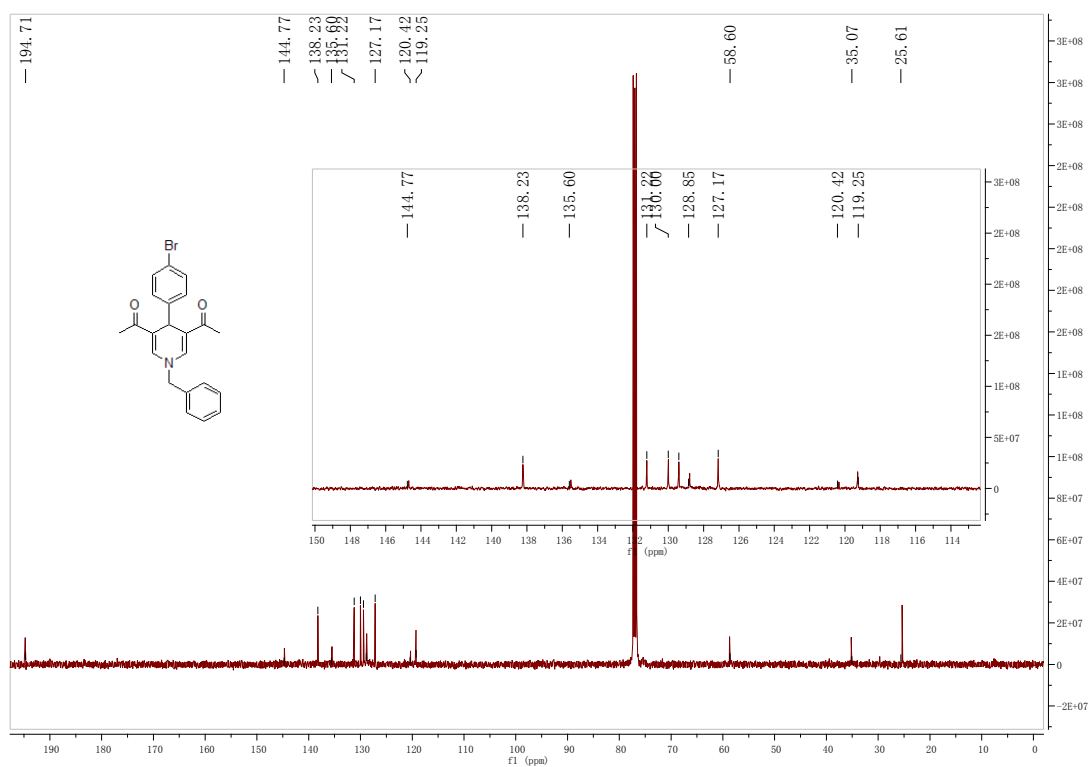

Supplement: c2ra23277d.pdf [file c2ra23277d.pdf]
